# Supplementary material for: Cluster analysis of angiotensin biomarkers to identify antihypertensive drug treatment in population studies
Source: Springer Nature journal article supplement (doi:10.1186/s12874-023-01930-8), 2023-05-27
Supplement: MOESM1 [file 25415420]

# **Cluster analysis of angiotensin biomarkers to identify antihypertensive drug treatment in population studies.**

## **Supplementary material**

|                                                                                                                                          |   |
|------------------------------------------------------------------------------------------------------------------------------------------|---|
| Supplementary Figure 1: Pairwise correlations between the clinical variables tested for inclusion in the penalized regression model..... | 2 |
| Supplementary Figure 2: identification of the optimal clustering solution via the Silhouette score metric. ....                          | 3 |
| Supplementary Table 1: Distributions of clinical variables across AHD groups. ....                                                       | 4 |
| Supplementary Table 2: Multiple pairwise-comparisons among the three clusters for clinical variables.....                                | 5 |

**Supplementary Figure 1: Pairwise correlations between the clinical variables tested for inclusion in the penalized regression model.**

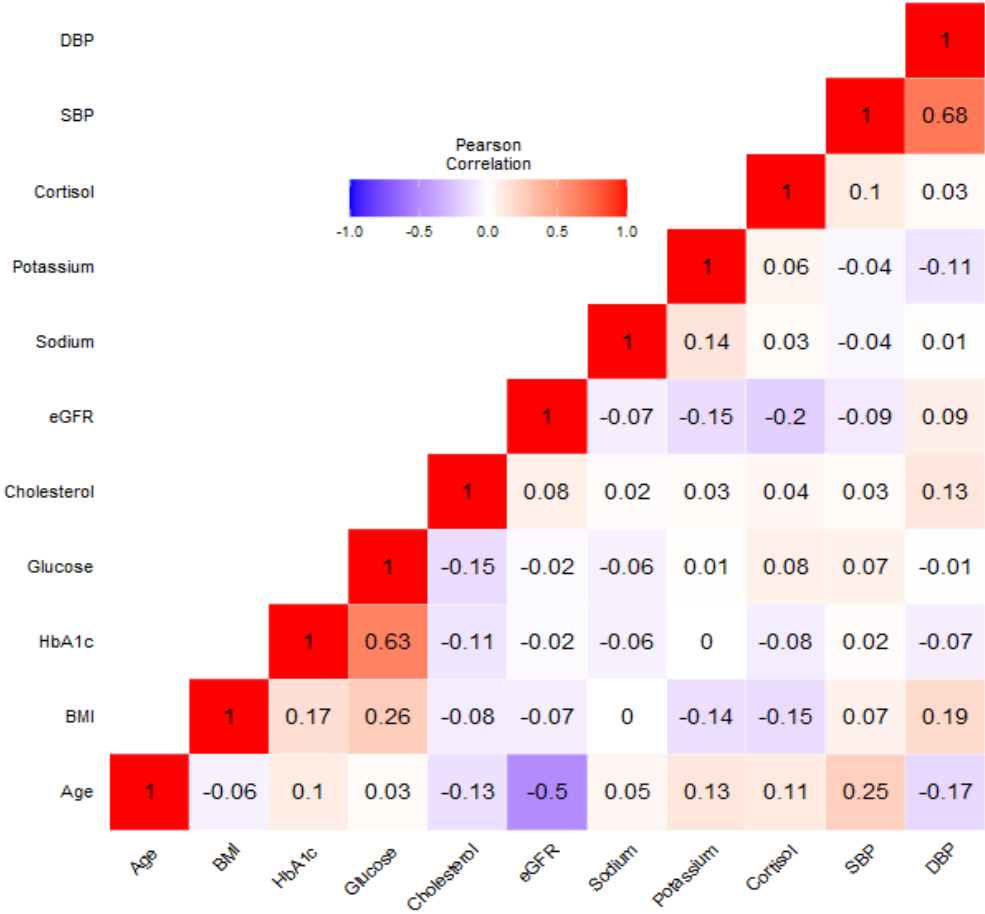

Supplementary Figure 2: identification of the optimal clustering solution via the Silhouette score metric. Extension to eight possible clusters which is equal to the number of antihypertensive treatment groups.

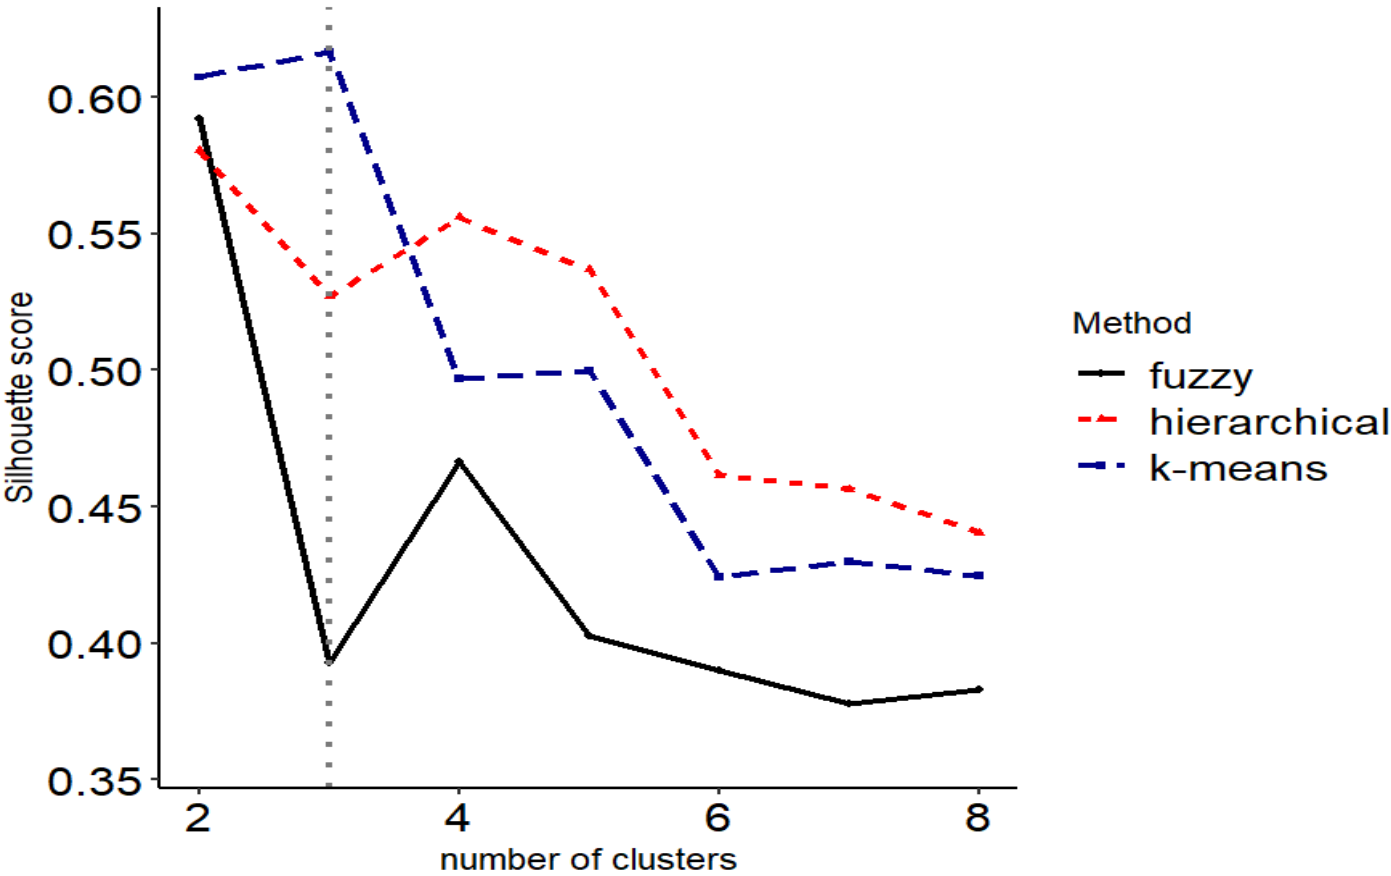

**Supplementary Table 1: Distributions of clinical variables across AHD groups. Reported are means and standard deviations.**

| <b>AHD group</b>       | <b>Glucose (mg/dl)</b> | <b>HbA1c (%)</b> | <b>Cholesterol (mg/dl)</b> | <b>eGFR (mL/min)</b> | <b>Potassium (mmol/L)</b> | <b>Sodium (mmol/L)</b> | <b>Cortisol (mmol/L)</b> |
|------------------------|------------------------|------------------|----------------------------|----------------------|---------------------------|------------------------|--------------------------|
| <b>Normotensive</b>    | 96.48(9.8)             | 5.86(0.37)       | 235.46(40.27)              | 78.93(11.13)         | 4.67(0.41)                | 141.19(2.41)           | 14.02(5.42)              |
| <b>Hypertensive</b>    | 99.19(14.29)           | 5.87(0.41)       | 236.85(39.68)              | 80.68(12.26)         | 4.59(0.33)                | 141.12(2.09)           | 14.01(4.48)              |
| <b>Non-AHD</b>         | 97.64(13.98)           | 5.85(0.46)       | 224.15(42.18)              | 77.87(13.11)         | 4.66(0.38)                | 141.25(2.29)           | 13.81(4.2)               |
| <b>Beta blocker</b>    | 99.71(11.62)           | 5.93(0.38)       | 215.93(44)                 | 76.8(14.25)          | 4.62(0.36)                | 140.79(2.08)           | 13.41(4.51)              |
| <b>ACEi</b>            | 102.02(15.99)          | 6.08(0.58)       | 220.22(44.35)              | 74.31(15.75)         | 4.73(0.45)                | 140.78(2.32)           | 13.46(4.89)              |
| <b>ACEi + diuretic</b> | 105.15(23.1)           | 6.11(0.69)       | 215.26(39.4)               | 72.68(15.55)         | 4.44(0.36)                | 140.62(2.31)           | 13.75(5.09)              |
| <b>ARB</b>             | 102.7(28.93)           | 6(0.65)          | 222.4(39.81)               | 76.21(13.8)          | 4.6(0.4)                  | 140.54(1.94)           | 12.97(4.14)              |
| <b>ARB + diuretic</b>  | 104.89(17.4)           | 6.08(0.56)       | 210.11(45.23)              | 74.42(13.31)         | 4.41(0.34)                | 140.95(2.79)           | 13.27(4.26)              |

**Supplementary Table 2: Multiple pairwise-comparisons among the three clusters for clinical variables.** The multiple pairwise-comparisons were corresponding to the variables that indicated statistically significant difference from the one-way ANOVA test of Table 3 of the main manuscript. Pairwise test 2-1 indicated test between clusters 2 (ARB enriched) and 1 (no treatment enriched), 3-1 for test between clusters 3 (ACEi enriched) and 1 and 3-2 for test between clusters 3 and 2. CI: confidence interval. The P-value was obtained from the pairwise test adjusting for multiple testing using the Tukey multiple test procedure.

| <b>Variable</b>               | <b>Pairwise test</b> | <b>difference of the means between clusters</b> | <b>Lower 95% CI</b> | <b>Upper 95% CI</b> | <b>P-value</b> |
|-------------------------------|----------------------|-------------------------------------------------|---------------------|---------------------|----------------|
| <b>BMI (kg/m<sup>2</sup>)</b> | 2-1                  | 1.614                                           | 0.725               | 2.503               | 0.0001         |
|                               | 3-1                  | 1.936                                           | 0.804               | 3.068               | 0.0002         |
|                               | 3-2                  | 0.322                                           | -0.913              | 1.557               | 0.8135         |
| <b>HbA1c (%)</b>              | 2-1                  | 0.13                                            | 0.03                | 0.231               | 0.0066         |
|                               | 3-1                  | 0.128                                           | 0.001               | 0.256               | 0.0482         |
|                               | 3-2                  | -0.002                                          | -0.141              | 0.137               | 0.9993         |
| <b>Glucose (mg/dl)</b>        | 2-1                  | 5.622                                           | 2.238               | 9.006               | 0.0003         |
|                               | 3-1                  | 3.723                                           | -0.579              | 8.024               | 0.1053         |
|                               | 3-2                  | -1.899                                          | -6.593              | 2.794               | 0.6086         |
| <b>eGFR (mL/min)</b>          | 2-1                  | -3.831                                          | -6.434              | -1.228              | 0.0017         |
|                               | 3-1                  | -4.791                                          | -8.1                | -1.482              | 0.0020         |
|                               | 3-2                  | -0.96                                           | -4.569              | 2.649               | 0.8067         |
| <b>SBP (mmHg)</b>             | 2-1                  | -5.582                                          | -8.866              | -2.298              | 0.0002         |
|                               | 3-1                  | -0.449                                          | -4.624              | 3.725               | 0.9654         |
|                               | 3-2                  | 5.133                                           | 0.578               | 9.688               | 0.0226         |
| <b>DBP (mmHg)</b>             | 2-1                  | -1.713                                          | -3.446              | 0.02                | 0.0435         |
|                               | 3-1                  | -1.316                                          | -3.519              | 0.887               | 0.3399         |
|                               | 3-2                  | 0.397                                           | -2.007              | 2.8                 | 0.9205         |
